# Supplementary material for: SARS-CoV-2 non-structural protein 6 triggers NLRP3-dependent pyroptosis by targeting ATP6AP1
Source: PubMed Central journal article supplement (PMC9177730; doi:10.1038/s41418-021-00916-7), 2022-01-08
Supplement: 41418_2021_916_MOESM11_ESM.pdf [file 41418_2021_916_MOESM11_ESM.pdf]

**Important information. Please read.**

- This form should be used by authors to request any change in authorship (adding/deleting authors) including changes in corresponding authors. This form should not be used for name changes. Please fully complete all sections. Use black ink and block capitals and provide each author's full name with the given name first followed by the family name.
- By signing this declaration, all authors guarantee that the order of the authors are in accordance with their scientific contribution, if applicable as different conventions apply per discipline, and that only authors have been added who made a meaningful contribution to the work.
- Please note, in author collaborations where there is formal agreement for representing the collaboration, it is sufficient for the representative or legal guarantor (usually the corresponding author) to complete and sign the Authorship Change Form on behalf of all authors, **next to the added/removed author(s). (Complete Section 3, followed by Section 6.)**  
In author collaborations where there is no formal agreement for representing the collaboration and **there are more than 10 authors**, one may sign for all, provided the signer appends correspondence that attests that each of the authors have agreed to the change **and the added/removed authors sign the form. (Complete Section 3, followed by Section 6.)**
- Please note, we cannot investigate or mediate any authorship disputes. If you are unable to obtain agreement from all authors (including those who you wish to be removed) you must refer the matter to your institution(s) for investigation. Please inform us if you need to do this.
- If you are not able to return a fully completed form within **30 days** of the date that it was sent to the author requesting the change, we may have to withdraw your manuscript. We cannot publish manuscripts where authorship has not been agreed by all authors (including those who have been removed).
- Incomplete forms will be rejected.
- Please return/upload this form, fully completed, to the Journals Editorial Office. The Journal and/or Publisher will consider the information you have provided to decide whether to approve the proposed change in authorship. We may decide to contact your institution for more information or undertake a further investigation, if appropriate, before making a final decision.

Section 1: Please provide the current title of manuscript

Manuscript ID no.: CDD-21-1422R

Title: SARS-CoV-2 Non-Structural Protein 6 Triggers NLRP3-dependent Pyroptosis by Targeting ATP6AP1

Section 2: Please provide the previous authorship, in the order shown on the manuscript before the changes were introduced. Please indicate the corresponding author by adding (CA) behind the name.

|                         | First name(s) | Family name | ORCID or SCOPUS id, if available |
|-------------------------|---------------|-------------|----------------------------------|
| 1 <sup>st</sup> author  | Xiao          | Sun         |                                  |
| 2 <sup>nd</sup> author  | Yingzhi       | Liu         |                                  |
| 3 <sup>rd</sup> author  | Ziheng        | Huang       |                                  |
| 4 <sup>th</sup> author  | Wenye         | Xu          |                                  |
| 5 <sup>th</sup> author  | Wei           | Hu          |                                  |
| 6 <sup>th</sup> author  | Hung          | Chan        |                                  |
| 7 <sup>th</sup> author  | Judeng        | Zeng        |                                  |
| 8 <sup>th</sup> author  | Xiaodong      | Liu         |                                  |
| 9 <sup>th</sup> author  | Huarong       | Chen        | 37119896400                      |
| 10 <sup>th</sup> author | Jun           | Yu          | 35351306800                      |

Please use an additional sheet if there are more than 10 authors.

|                         | First name(s)      | Family name | ORCID or SCOPUS id, if available |
|-------------------------|--------------------|-------------|----------------------------------|
| 11 <sup>th</sup> author | Francis Ka Leung   | Chan        | 0000-0001-7388-2436              |
| 12 <sup>th</sup> author | Siew Chien         | Ng          | 0000-0002-6850-4454              |
| 13 <sup>th</sup> author | Sunny Hei          | Wong        | 0000-0002-3354-9310              |
| 14 <sup>th</sup> author | Maggie Haitian     | Wang        | 55596673500                      |
| 15 <sup>th</sup> author | Tony               | Gin         | 0000-0001-7283-6761              |
| 16 <sup>th</sup> author | Gavin Matthew      | Joynt       | 7005588815                       |
| 17 <sup>th</sup> author | David Shu Cheong   | Hui         | 0000-0003-4382-2445              |
| 18 <sup>th</sup> author | Xuan               | Zou         |                                  |
| 19 <sup>th</sup> author | Yuelong            | Shu         |                                  |
| 20 <sup>th</sup> author | Shisong            | Fang        | 7402422510                       |
| 21 <sup>st</sup> author | Huanle             | Luo         | 56486560600                      |
| 22 <sup>nd</sup> author | Matthew Tak Vai    | Chan        | 0000-0002-3574-7855              |
| 23 <sup>rd</sup> author | Christopher Hon Ki | Cheng       | 57220698091                      |
| 24 <sup>th</sup> author | Lin                | Zhang       | 0000-0003-1634-3780              |
| 25 <sup>th</sup> author | William Ka Kei     | Wu          | 0000-0002-5662-5240              |

**Section 3: Please provide a justification for change. Please use this section to explain your reasons for changing the authorship of your manuscript, e.g. what necessitated the change in authorship? Please refer to the (journal) policy pages for more information about authorship. Please explain why omitted authors were not originally included and/or why authors were removed on the submitted manuscript.**

1. Lina Yi, Zhe Liu and Jing Lu are added as new authors. These 3 authors contributed to the execution of live SARS-CoV-2 infection experiments.
2. Jing Lu is a new co-corresponding author. He contributed to the coordination of live SARS-CoV-2 infection experiments.
3. Christopher Hon Ki Cheng can no longer serve as co-corresponding author due to his untimely demise after the initial submission (<https://www2.sbs.cuhk.edu.hk/en-gb/news-and-events/news/2021-news/1305-in-memoriam-prof-cheng-hon-ki-christopher>)

**Section 4: Proposed new authorship. Please provide your new authorship list in the order you would like it to appear on the manuscript. Please indicate the corresponding author by adding (CA) behind the name. If the Corresponding Author has changed, please indicate the reason under section 3.**

|                         | First name(s) | Family name (this name will appear in full on the final publication and will be searchable in various abstract and indexing databases) | Affiliated institute                                                                                                 | E-mail address           |
|-------------------------|---------------|----------------------------------------------------------------------------------------------------------------------------------------|----------------------------------------------------------------------------------------------------------------------|--------------------------|
| 1 <sup>st</sup> author  | Xiao          | Sun                                                                                                                                    | The Chinese University of Hong Kong                                                                                  | sunxiaosara@gmail.com    |
| 2 <sup>nd</sup> author  | Yingzhi       | Liu                                                                                                                                    | The Chinese University of Hong Kong                                                                                  | wing_lau@outlook.com     |
| 3 <sup>rd</sup> author  | Ziheng        | Huang                                                                                                                                  | The Chinese University of Hong Kong                                                                                  | zhhuang@link.cuhk.edu.hk |
| 4 <sup>th</sup> author  | Wenye         | Xu                                                                                                                                     | The Chinese University of Hong Kong                                                                                  | xuwenxiaoye@163.com      |
| 5 <sup>th</sup> author  | Wei           | Hu                                                                                                                                     | Southern Medical University                                                                                          | huwei1683013@163.com     |
| 6 <sup>th</sup> author  | Lina          | Yi                                                                                                                                     | Guangdong Provincial Institution of Public Health and Guangdong Provincial Center for Disease Control and Prevention | linayi2009@live.cn       |
| 7 <sup>th</sup> author  | Zhe           | Liu                                                                                                                                    | Guangdong Provincial Institution of Public Health and Guangdong Provincial Center for Disease Control and Prevention | lzhwin@foxmail.com       |
| 8 <sup>th</sup> author  | Hung          | Chan                                                                                                                                   | The Chinese University of Hong Kong                                                                                  | marcuschan64@gmail.com   |
| 9 <sup>th</sup> author  | Judeng        | Zeng                                                                                                                                   | The Chinese University of Hong Kong                                                                                  | zjdseed@163.com          |
| 10 <sup>th</sup> author | Xiaodong      | Liu                                                                                                                                    | The Chinese University of Hong Kong                                                                                  | xdliu@cuhk.edu.hk        |

Please use an additional sheet if there are more than 10 authors.

|                         | First name(s)      | Family name (this name will appear in full on the final publication and will be searchable in various abstract and indexing databases) | Affiliated institute                               | E-mail address             |
|-------------------------|--------------------|----------------------------------------------------------------------------------------------------------------------------------------|----------------------------------------------------|----------------------------|
| 11 <sup>th</sup> author | Huarong            | Chen                                                                                                                                   | The Chinese University of Hong Kong                | hchen2@cuhk.edu.hk         |
| 12 <sup>th</sup> author | Jun                | Yu                                                                                                                                     | The Chinese University of Hong Kong                | junyu@cuhk.edu.hk          |
| 13 <sup>th</sup> author | Francis Ka Leung   | Chan                                                                                                                                   | The Chinese University of Hong Kong                | fklchan@cuhk.edu.hk        |
| 14 <sup>th</sup> author | Siew Chien         | Ng                                                                                                                                     | The Chinese University of Hong Kong                | siewchienng@cuhk.edu.hk    |
| 15 <sup>th</sup> author | Sunny Hei          | Wong                                                                                                                                   | The Chinese University of Hong Kong                | wonghei@cuhk.edu.hk        |
| 16 <sup>th</sup> author | Maggie Haitian     | Wang                                                                                                                                   | The Chinese University of Hong Kong                | maggiew@cuhk.edu.hk        |
| 17 <sup>th</sup> author | Tony               | Gin                                                                                                                                    | The Chinese University of Hong Kong                | tgin@cuhk.edu.hk           |
| 18 <sup>th</sup> author | Gavin Matthew      | Joynt                                                                                                                                  | The Chinese University of Hong Kong                | gavinmjoynt@cuhk.edu.hk    |
| 19 <sup>th</sup> author | David Shu Cheong   | Hui                                                                                                                                    | The Chinese University of Hong Kong                | dschui@cuhk.edu.hk         |
| 20 <sup>th</sup> author | Xuan               | Zou                                                                                                                                    | Shenzhen Center for Disease Control and Prevention | 914494557@qq.com           |
| 21 <sup>st</sup> author | Yuelong            | Shu                                                                                                                                    | Sun Yat-sen University                             | shuyulong@mail.sysu.edu.cn |
| 22 <sup>nd</sup> author | Christopher Hon Ki | Cheng                                                                                                                                  | The Chinese University of Hong Kong                | chkcheng@cuhk.edu.hk       |

|                         |                 |       |                                                                                                                      |                         |
|-------------------------|-----------------|-------|----------------------------------------------------------------------------------------------------------------------|-------------------------|
| 23 <sup>rd</sup> author | Shisong         | Fang  | Shenzhen Center for Disease Control and Prevention                                                                   | szcdcssf@aliyun.com     |
| 24 <sup>th</sup> author | Huanle          | Luo   | Sun Yat-sen University                                                                                               | luohle@mail.sysu.edu.cn |
| 25 <sup>th</sup> author | Jing            | Lu    | Guangdong Provincial Institution of Public Health and Guangdong Provincial Center for Disease Control and Prevention | jimlu0331@163.com       |
| 26 <sup>th</sup> author | Matthew Tak Vai | Chan  | The Chinese University of Hong Kong                                                                                  | mtvchan@cuhk.edu.hk     |
| 27 <sup>th</sup> author | Lin             | Zhang | The Chinese University of Hong Kong                                                                                  | linzhang@cuhk.edu.hk    |
| 28 <sup>th</sup> author | William Ka Kei  | Wu    | The Chinese University of Hong Kong                                                                                  | wukakei@cuhk.edu.hk     |

Section 5: Author contribution, Acknowledgement and Disclosures. Please use this section to provide a new disclosure statement and, if appropriate, acknowledge any contributors who have been removed as authors and ensure you state what contribution any new authors made (if applicable per the journal or book (series) policy). **Please ensure these are updated in your manuscript - after approval of the change(s) - as our production department will not transfer the information in this form to your manuscript.**

**New acknowledgements:**

Not applicable

**New Disclosures (financial and non-financial interests, funding):**

Not applicable

**New Author Contributions statement (if applicable per the journal policy):**

Conceptualization: WKKW  
Methodology: WKKW  
Formal analysis: XS, JZ, XL  
Investigation: XS, JL, ZL, LNY, YL, ZH, WX  
Resources: XZ, YS, SF, HL, JL  
Writing – Original Draft: XS  
Writing – Review: WKKW  
Writing – Editing: LZ, JY, FKLC, SCN, SHW, TG, GMJ, DSCH  
Supervision: WKKW, CHKC, MTVC, LZ

State 'Not applicable' if there are no new authors.

**Section 6: Declaration of agreement. All authors, unchanged, new and removed *must* sign this declaration.**

(NB: Please print the form, (docu)-sign and return/upload a scanned copy. Please note that signatures that have been inserted as an image file are acceptable as long as it is handwritten. Typed names in the signature box are unacceptable.) \* Please delete as appropriate. Delete all of the bold if you were on the original authorship list and are remaining as an author.

|                         | First name | Family name |                                                                                                                                                                                     | Signature                                                                             | Date        |
|-------------------------|------------|-------------|-------------------------------------------------------------------------------------------------------------------------------------------------------------------------------------|---------------------------------------------------------------------------------------|-------------|
| 1 <sup>st</sup> author  | Xiao       | Sun         | I agree to the proposed new authorship shown in section 4 / <del>and the addition/removal* of my name to the authorship list</del> /and the proposed change in corresponding author |    | 03 Nov 2021 |
| 2 <sup>nd</sup> author  | Yingzhi    | Liu         | I agree to the proposed new authorship shown in section 4 / <del>and the addition/removal* of my name to the authorship list</del> /and the proposed change in corresponding author |    | 03 Nov 2021 |
| 3 <sup>rd</sup> author  | Ziheng     | Huang       | I agree to the proposed new authorship shown in section 4 / <del>and the addition/removal* of my name to the authorship list</del> /and the proposed change in corresponding author |    | 03 Nov 2021 |
| 4 <sup>th</sup> authors | Wenye      | Xu          | I agree to the proposed new authorship shown in section 4 / <del>and the addition/removal* of my name to the authorship list</del> /and the proposed change in corresponding author |    | 03 Nov 2021 |
| 5 <sup>th</sup> author  | Wei        | Hu          | I agree to the proposed new authorship shown in section 4 / <del>and the addition/removal* of my name to the authorship list</del> /and the proposed change in corresponding author |   | 02 Nov 2021 |
| 6 <sup>th</sup> author  | Lina       | Yi          | I agree to the proposed new authorship shown in section 4 / <del>and the addition/removal* of my name to the authorship list</del> /and the proposed change in corresponding author |  | 03 Nov 2021 |
| 7 <sup>th</sup> author  | Zhe        | Liu         | I agree to the proposed new authorship shown in section 4 / <del>and the addition/removal* of my name to the authorship list</del> /and the proposed change in corresponding author |  | 03 Nov 2021 |



|                         | First name | Family name |                                                                                                                                                                                    | Signature                                                                           | Date       |
|-------------------------|------------|-------------|------------------------------------------------------------------------------------------------------------------------------------------------------------------------------------|-------------------------------------------------------------------------------------|------------|
| 8 <sup>th</sup> author  | Hung       | Chan        | I agree to the proposed new authorship shown in section 4 / <del>and the addition/removal*of my name to the authorship list</del> /and the proposed change in corresponding author |  | 3 Nov 2021 |
| 9 <sup>th</sup> author  | Judeng     | Zeng        | I agree to the proposed new authorship shown in section 4 / <del>and the addition/removal*of my name to the authorship list</del> /and the proposed change in corresponding author |  | 3 Nov 2021 |
| 10 <sup>th</sup> author | Xiaodong   | Liu         | I agree to the proposed new authorship shown in section 4 / <del>and the addition/removal*of my name to the authorship list</del> /and the proposed change in corresponding author |  | 02/11/2021 |

Please use an additional sheet if there are more than 10 authors.

**In case of author collaborations with formal agreement:**

|                                | Name of consortium/consortia | First name | Family name |                                                                                                                                                                                    | Signature | Date |
|--------------------------------|------------------------------|------------|-------------|------------------------------------------------------------------------------------------------------------------------------------------------------------------------------------|-----------|------|
| Representative/legal guarantor |                              |            |             | I agree to the proposed new authorship shown in section 4 / <del>and the addition/removal*of my name to the authorship list</del> /and the proposed change in corresponding author |           |      |

Both added/removed authors should complete the information in the first table under Section 6.

---- End of form ----

|                         | First name       | Family name |                                                                                                                                                                        | Signature                                                                             | Date       |
|-------------------------|------------------|-------------|------------------------------------------------------------------------------------------------------------------------------------------------------------------------|---------------------------------------------------------------------------------------|------------|
| 11 <sup>th</sup> author | Huarong          | Chen        | I agree to the proposed new authorship shown in section 4 /and the addition/removal*of my name to the authorship list /and the proposed change in corresponding author |    | 2 Nov 2021 |
| 12 <sup>th</sup> author | Jun              | Yu          | I agree to the proposed new authorship shown in section 4 /and the addition/removal*of my name to the authorship list /and the proposed change in corresponding author |    | 2 Nov 2021 |
| 13 <sup>th</sup> author | Francis Ka Leung | Chan        | I agree to the proposed new authorship shown in section 4 /and the addition/removal*of my name to the authorship list /and the proposed change in corresponding author |    | 3 Nov 2021 |
| 14 <sup>th</sup> author | Siew Chien       | Ng          | I agree to the proposed new authorship shown in section 4 /and the addition/removal*of my name to the authorship list /and the proposed change in corresponding author |    | 3 Nov 2021 |
| 15 <sup>th</sup> author | Sunny Hei        | Wong        | I agree to the proposed new authorship shown in section 4 /and the addition/removal*of my name to the authorship list /and the proposed change in corresponding author |   | 3 Nov 2021 |
| 16 <sup>th</sup> author | Maggie Haitian   | Wang        | I agree to the proposed new authorship shown in section 4 /and the addition/removal*of my name to the authorship list /and the proposed change in corresponding author |  | 3 Nov 2021 |
| 17 <sup>th</sup> author | Tony             | Gin         | I agree to the proposed new authorship shown in section 4 /and the addition/removal*of my name to the                                                                  |  | 4 Nov 2021 |

|                         |                    |       |                                                                                                                                                                        |                                                                                                                                                                                              |            |
|-------------------------|--------------------|-------|------------------------------------------------------------------------------------------------------------------------------------------------------------------------|----------------------------------------------------------------------------------------------------------------------------------------------------------------------------------------------|------------|
|                         |                    |       | authorship list /and the proposed change in corresponding author                                                                                                       |                                                                                                                                                                                              |            |
| 18 <sup>th</sup> author | Gavin Matthew      | Joynt | I agree to the proposed new authorship shown in section 4 /and the addition/removal*of my name to the authorship list /and the proposed change in corresponding author |                                                                                                           | 3 Nov 2021 |
| 19 <sup>th</sup> author | David Shu Cheong   | Hui   | I agree to the proposed new authorship shown in section 4 /and the addition/removal*of my name to the authorship list /and the proposed change in corresponding author |                                                                                                           | 3 Nov 2021 |
| 20 <sup>th</sup> author | Xuan               | Zhu   | I agree to the proposed new authorship shown in section 4 /and the addition/removal*of my name to the authorship list /and the proposed change in corresponding author |                                                                                                           | 2 Nov 2021 |
| 21 <sup>st</sup> author | Yuelong            | Shu   | I agree to the proposed new authorship shown in section 4 /and the addition/removal*of my name to the authorship list /and the proposed change in corresponding author |                                                                                                           | 4 Nov 2021 |
| 22 <sup>nd</sup> author | Christopher Hon Ki | Cheng | I agree to the proposed new authorship shown in section 4 /and the addition/removal*of my name to the authorship list /and the proposed change in corresponding author | <br>(signed by William K.K. Wu on behalf of Prof. Christopher Hon Ki Cheng who deceased on 12 July 2021) | 2 Nov 2021 |
| 23 <sup>rd</sup> author | Shisong            | Fang  | I agree to the proposed new authorship shown in section 4 /and the addition/removal*of my name to the authorship list /and the proposed change in corresponding author |                                                                                                         | 2 Nov 2021 |
| 24 <sup>th</sup> author | Huanle             | Luo   | I agree to the proposed new authorship shown in section 4 /and the addition/removal*of my name to the                                                                  |                                                                                                         | 2 Nov 2021 |

|                         |                 |       |                                                                                                                                                                                     |                                                                                     |            |
|-------------------------|-----------------|-------|-------------------------------------------------------------------------------------------------------------------------------------------------------------------------------------|-------------------------------------------------------------------------------------|------------|
|                         |                 |       | authorship list /and the proposed change in corresponding author                                                                                                                    |                                                                                     |            |
| 25 <sup>th</sup> author | Jing            | Lu    | I agree to the proposed new authorship shown in section 4 /and the addition/ <del>removal</del> *of my name to the authorship list /and the proposed change in corresponding author |  | 2 Nov 2021 |
| 26 <sup>th</sup> author | Matthew Tak Vai | Chan  | I agree to the proposed new authorship shown in section 4 /and the addition/ <del>removal</del> *of my name to the authorship list /and the proposed change in corresponding author |  | 2 Nov 2021 |
| 27 <sup>th</sup> author | Lin             | Zhang | I agree to the proposed new authorship shown in section 4 /and the addition/ <del>removal</del> *of my name to the authorship list /and the proposed change in corresponding author |  | 2 Nov 2021 |
| 28 <sup>th</sup> author | William Ka Kei  | Wu    | I agree to the proposed new authorship shown in section 4 /and the addition/ <del>removal</del> *of my name to the authorship list /and the proposed change in corresponding author |  | 2 Nov 2021 |
